# Supplementary material for: NZ-RugbyHealth Study: Self-reported Injury Experience and Current Health of Former Rugby Union and Non-contact Sport Players
Source: PubMed Central journal article supplement (PMC9213390; doi:10.1007/s40279-021-01630-7), 2022-01-28

**NZ-RUGBYHEALTH STUDY: SELF-REPORTED INJURY EXPERIENCE AND CURRENT HEALTH OF FORMER RUGBY UNION AND NON-CONTACT SPORT PLAYERS**

**Short title/running head:** Injury history and health of former rugby and non-contact sport players.

Patria A Hume<sup>\*1,2</sup>, Kenneth L Quarrie<sup>4,1</sup>, Gwyn N Lewis<sup>3</sup>, Alice Theadom<sup>2</sup>

<sup>1</sup> Sports Performance Research Institute New Zealand (SPRINZ), Auckland University of Technology, Auckland, New Zealand

<sup>2</sup> Traumatic Brain Injury Network (TBIN), Auckland University of Technology, Auckland, New Zealand

<sup>3</sup> Health and Rehabilitation Research Institute (HRRI), Auckland University of Technology, Auckland, New Zealand

<sup>4</sup> New Zealand Rugby, Wellington, New Zealand

\*Author for correspondence:

Professor Patria Hume PhD

Sport Performance Research Institute New Zealand, Faculty of Health and Environmental Sciences, Auckland University of Technology, Private Bag 92006, Auckland 1142, New Zealand

Email [patria.hume@aut.ac.nz](mailto:patria.hume@aut.ac.nz)

Electronic Supplementary Materials: 1 (Health ratings by group and concussion experience)

Overall health ratings by concussion exposure by sport

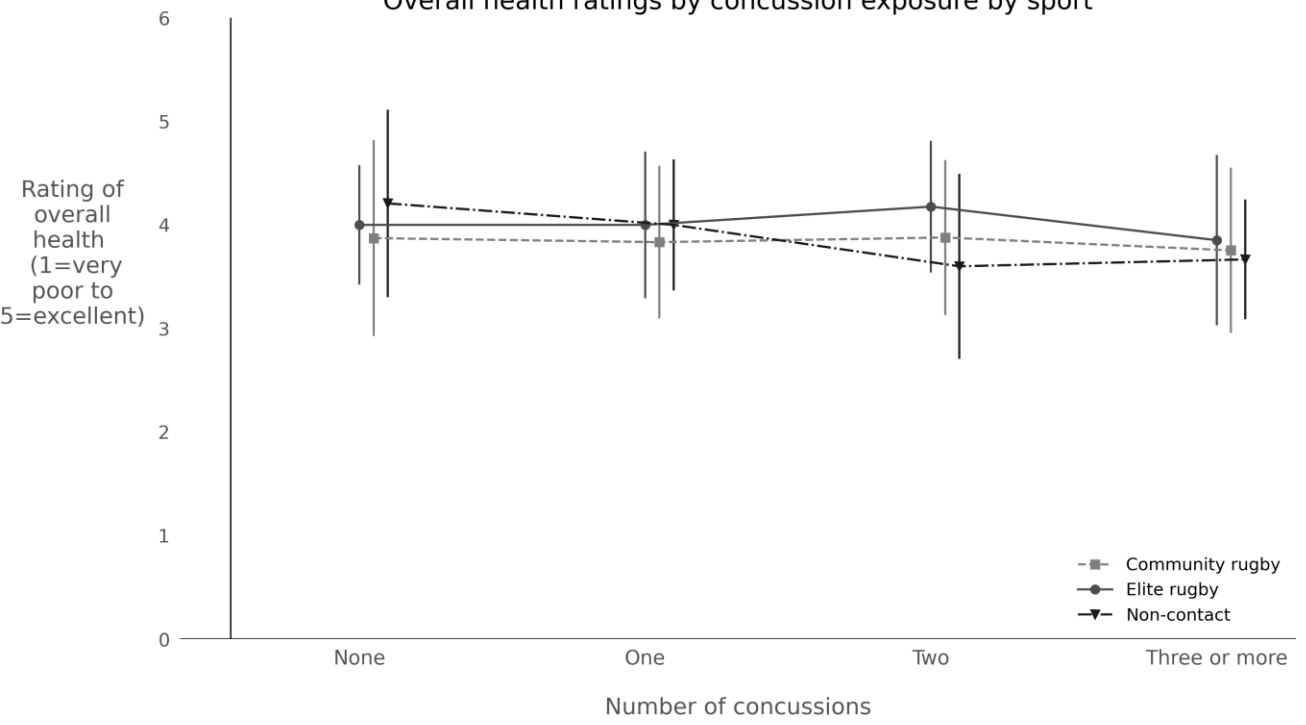

Physical health ratings by concussion exposure by sport

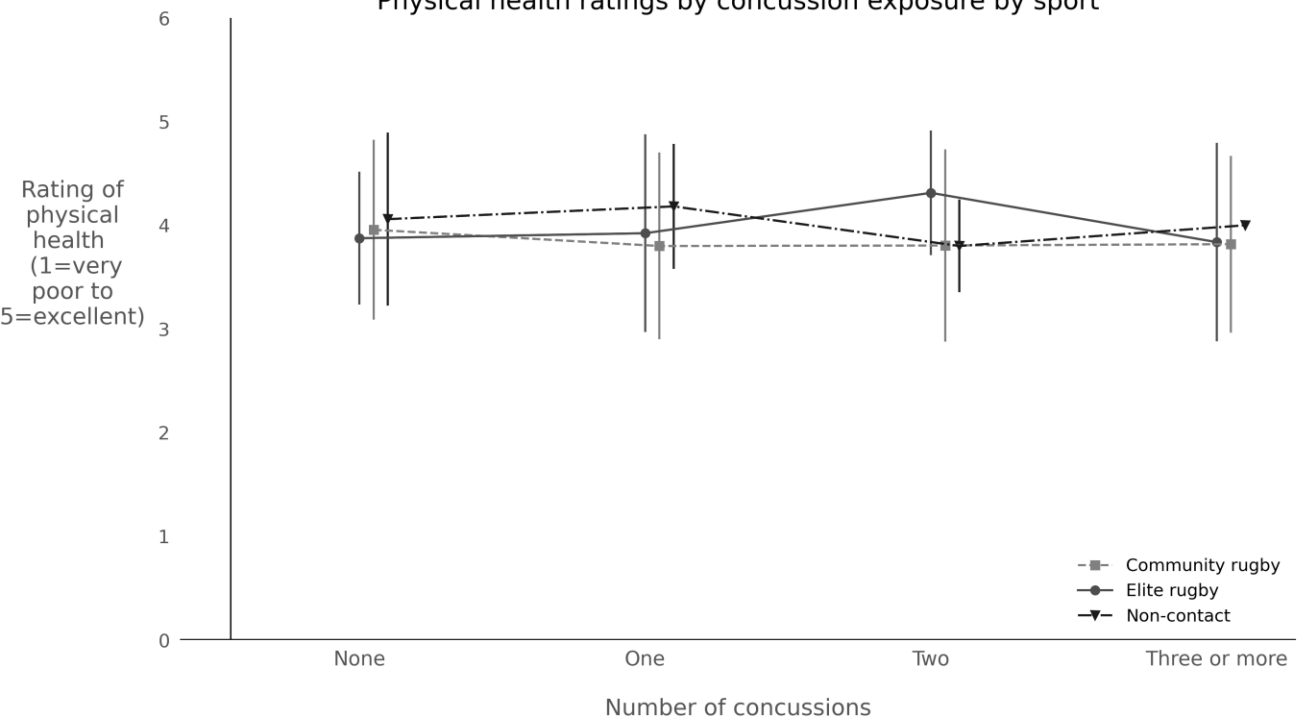

Psychological health ratings by concussion exposure by sport

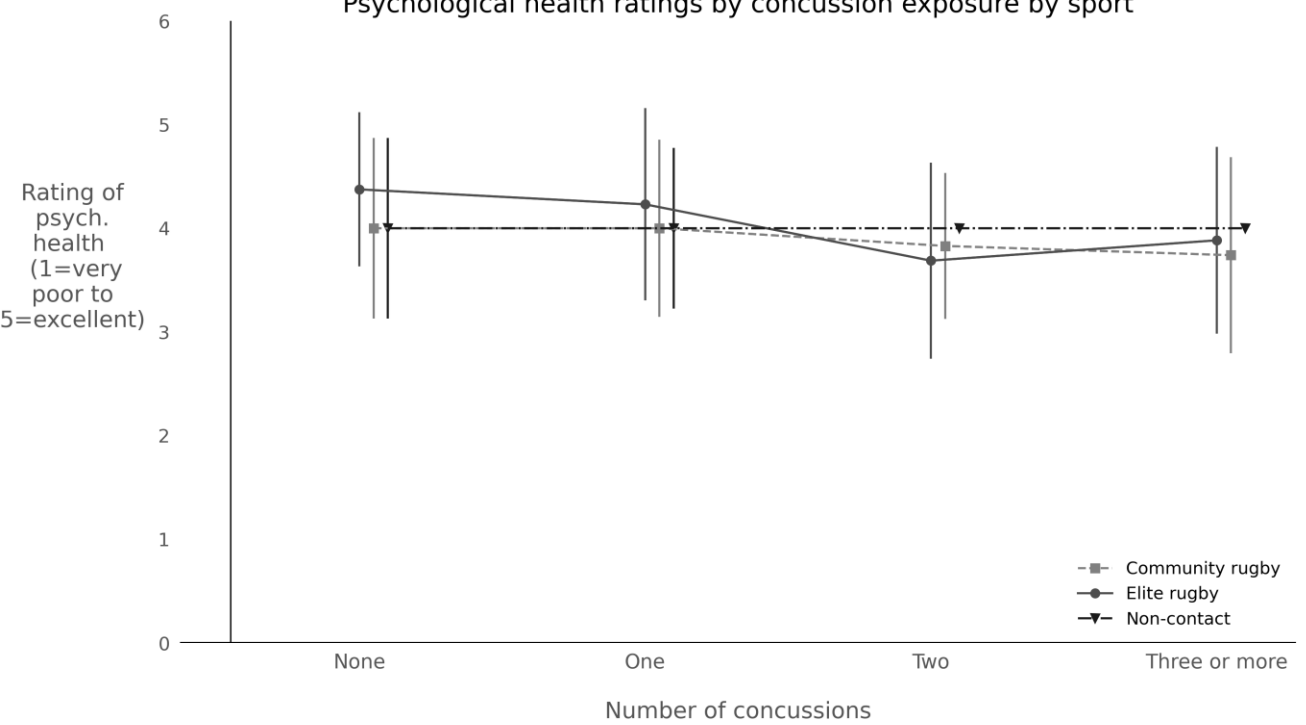

Fitness ratings by concussion exposure by sport

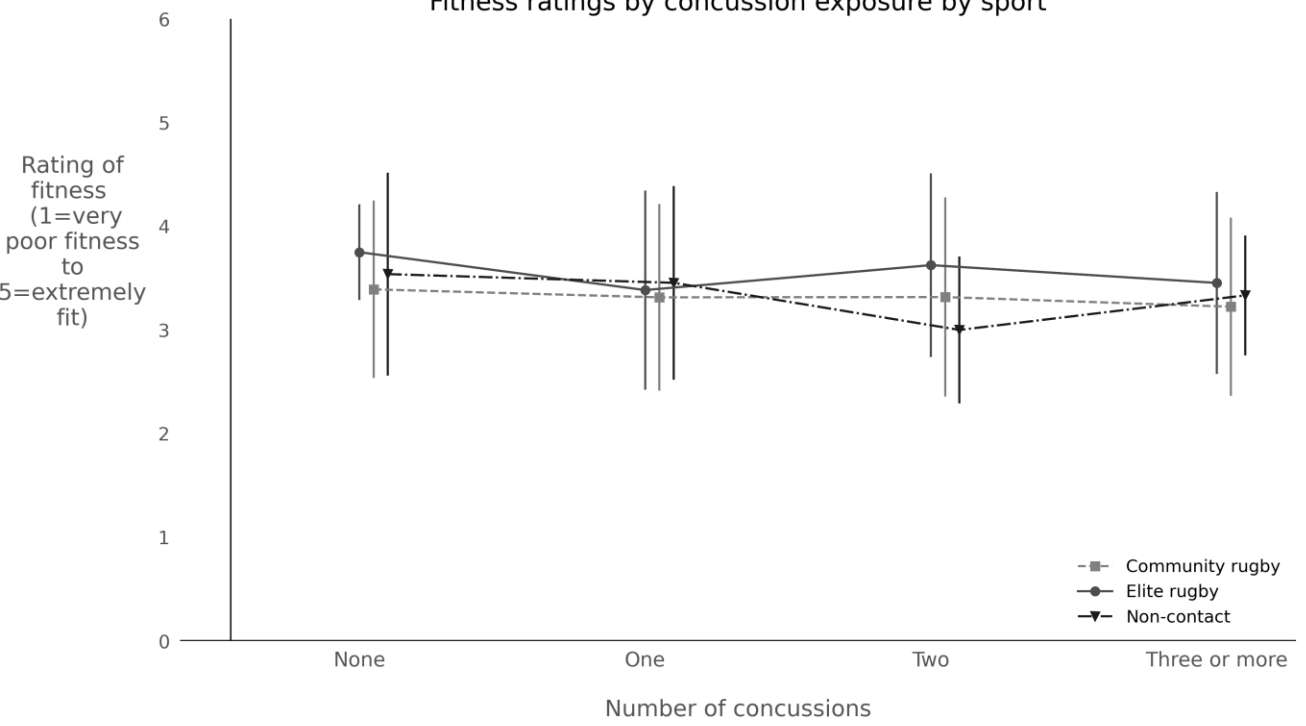

Do it again ratings by concussion exposure by sport

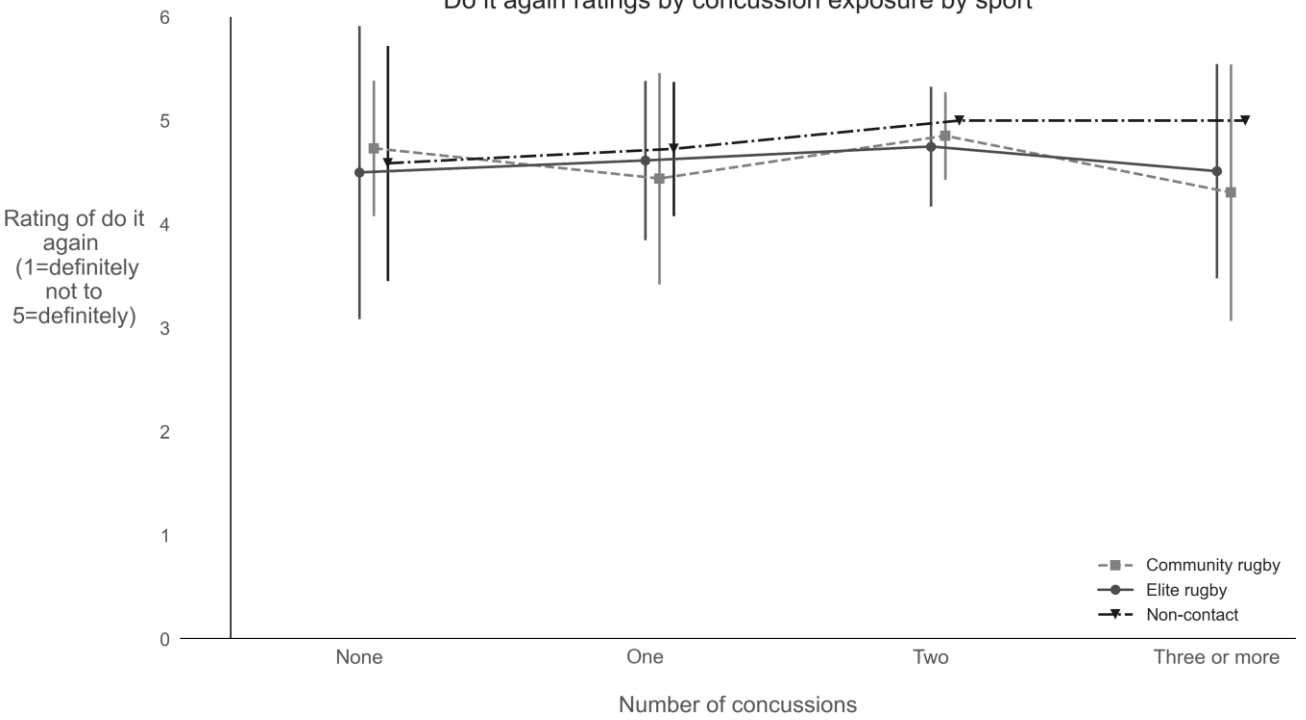

Supplement: 40279_2021_1630_MOESM1_ESM.pdf [file 40279_2021_1630_MOESM1_ESM.pdf]
